# Supplementary material for: Probable Bruxism and Psychological Issues among Dental Students in Serbia during the COVID-19 Pandemic
Source: MDPI journal article supplement (doi:10.3390/ijerph19137729), 2022-06-23
Supplement: s1 [file s1]

# Questionnaire

|                  |                                                                                              |  |
|------------------|----------------------------------------------------------------------------------------------|--|
| <b>SECTION A</b> |                                                                                              |  |
| 1.               | Name                                                                                         |  |
| 2.               | Gender                                                                                       |  |
| 3.               | Age                                                                                          |  |
| 4.               | Year of study                                                                                |  |
| 5.               | Phone number                                                                                 |  |
| 6.               | Presence of any chronic disease?                                                             |  |
| 7.               | Are you currently taking some medication?                                                    |  |
| <b>SECTION B</b> |                                                                                              |  |
| 1.               | Have you been tested positive for the presence of Covid 19?                                  |  |
| 2.               | If yes, have you been hospitalized because of the present symptoms?                          |  |
| 3.               | Have you been in isolation because of the close contact with the infected person?            |  |
| 4.               | Was some close family member of yours infected with Covid 19?                                |  |
| 5.               | Was some close family member of yours hospitalized because of the present symptoms?          |  |
| 6.               | Have you been vaccinated against Covid 19 virus infection?                                   |  |
| <b>SECTION C</b> |                                                                                              |  |
| 1.               | Are you aware of the fact of grinding or clenching your teeth during sleep or when awake?    |  |
| 2.               | Have you ever been told that you grind your teeth during sleep?                              |  |
| 3.               | Do you have your jaws thrust or braced after you wake up in the morning or during the night? |  |
| 4.               | Have you noticed a worsening of symptoms since the beginning of the Covid 19 pandemic?       |  |
